# Supplementary material
Source: HighWire-hosted journal article supplement (https://erj.ersjournals.com/content/51/1/1701612)
Supplement: inline-supplementary-material-1 [file inline-supplementary-material-1.pdf]

## **Supplementary Material**

### **Hospitalisation assessments by the Endpoint Validation Committee (EVC).**

EVC members were 3 respiratory physicians independent from the sponsor and investigational sites. They independently reviewed all hospitalisation reports (unplanned admissions and subsequent nursing facility admissions, when applicable) and reviewed the list of all planned admissions with their cause. For EVC reviews, source documents were translated into English and blinded for the intervention allocated to the patients. Commercial names of medications were also replaced with their international non-proprietary names in order to mask the country. Cases were considered resolved upon unanimous agreement of the adjudication parameters. Reports not unanimously adjudicated initially were further reviewed and discussed until unanimous consensus was achieved. Hospitalisation days validated by the EVC were used in supportive analysis of the primary efficacy criterion.

### **Protocol amendments.**

During the study, the protocol was amended to accelerate recruitment and allow study completion: inclusion criteria were expanded from COPD patients receiving LTOT to patients with severe COPD, with or without LTOT; the minimum number of patients was reduced from 520 to 306 by retaining the initial assumptions for sample size and removing a multiple comparisons adjustment; the follow-up period was reduced from 2 years to 1 year; and the contact frequency between DM patients and CMs was increased to improve patient training (either group or phone session, once per month). Prior to these changes, 72 patients on LTOT were enrolled in the study.

**Table E1. Patient baseline characteristics and outcomes by country.**

| Baseline characteristic <sup>a</sup>                              | France (N=115)           | Spain (N=89)             | Germany (N=73)            | Italy (N=42)             | P <sup>b</sup>      |
|-------------------------------------------------------------------|--------------------------|--------------------------|---------------------------|--------------------------|---------------------|
| Age, y                                                            | 65.4 ± 9.4               | 70.4 ± 7.8               | 62.3 ± 8.3                | 71.9 ± 8.5               | <0.001              |
| Men, n (%)                                                        | 72 (62.6)                | 76 (85.4)                | 39 (53.4)                 | 35 (83.3)                | <0.001 <sup>c</sup> |
| Current smokers, n (%)                                            | 32 (27.8)                | 10 (11.2)                | 19 (26.0)                 | 7 (16.7)                 | 0.020 <sup>c</sup>  |
| Body mass index, kg/m <sup>2</sup>                                | 25.8 ± 5.8               | 27.8 ± 6.4               | 25.5 ± 6.7                | 26.7 ± 6.4               | 0.079               |
| Number of concomitant diseases <sup>d</sup>                       | 3.3 ± 1.8                | 3.3 ± 2.0                | 3.8 ± 2.2                 | 3.6 ± 2.1                | 0.408               |
| FEV <sub>1</sub> , % of predicted                                 | 35.4 ± 12.8              | 39.8 ± 11.8              | 35.2 ± 12.4               | 39.2 ± 11.1              | 0.024               |
| PaO <sub>2</sub> (room air), mmHg                                 | 64.1 ± 10.5              | 61.0 ± 10.3              | 58.6 ± 9.1                | 66.6 ± 11.4              | <0.001              |
| PaCO <sub>2</sub> (room air), mmHg                                | 43.3 ± 5.9               | 43.2 ± 6.3               | 43.9 ± 7.6                | 44.6 ± 5.9               | 0.681               |
| GOLD group D, n (%)                                               | 86 (78.9)                | 75 (86.2)                | 55 (79.7)                 | 30 (71.4)                | <0.001 <sup>e</sup> |
| SGRQ-C total score                                                | 55.8 ± 19.2              | 50.1 ± 17.5              | 61.5 ± 18.6               | 51.7 ± 20.3              | 0.006               |
| HADS total score                                                  | 21.6 ± 3.1               | 20.8 ± 3.0               | 21.9 ± 3.0                | 19.5 ± 2.6               | <0.001              |
| Hospitalised exacerbations in the past 12 months                  | 1.0 ± 0.5                | 1.3 ± 0.9                | 1.1 ± 0.6                 | 1.1 ± 0.7                | 0.148               |
| Long-term oxygen therapy, n (%)                                   | 80 (69.6)                | 59 (66.3)                | 65 (89.0)                 | 33 (78.6)                | 0.005 <sup>c</sup>  |
| Home mechanical ventilation, n (%)                                | 39 (33.9)                | 12 (13.5)                | 32 (43.8)                 | 4 (9.5)                  | <0.001 <sup>c</sup> |
| <b>Outcomes</b>                                                   |                          |                          |                           |                          |                     |
| Hospitalisation outcomes, mean ± SD; (median [Q1–Q3])             |                          |                          |                           |                          |                     |
| Unplanned hospitalisation days/year, any cause (primary endpoint) | 24.4 ± 46.4; (4 [0–259]) | 9.7 ± 22.7; (0 [0–123])  | 28.7 ± 40.9; (14 [0–203]) | 15.0 ± 34.8; (0 [0–163]) | 0.006 <sup>f</sup>  |
| All-cause, acute care wards                                       | 19.3 ± 40.3; (4 [0–259]) | 9.7 ± 22.7; (0 [0–123])  | 27.7 ± 38.9; (14 [0–203]) | 11.5 ± 31.9; (0 [0–163]) |                     |
| AECOPD (acute care/nursing facilities)                            | 5.6 ± 11.1; (0 [0–60])   | 5.5 ± 14.5; (0 [0–100])  | 18.4 ± 28.8; (6 [0–145])  | 5.3 ± 15.8; (0 [0–94])   |                     |
| LTOT/HMV patients (n=243)                                         | 26.6 ± 49.8; (6 [0–259]) | 12.7 ± 26.3; (1 [0–123]) | 31.4 ± 42.6; (15 [0–203]) | 15.9 ± 37.1; (0 [0–163]) |                     |

|                          |                      |                      |                      |                       |  |
|--------------------------|----------------------|----------------------|----------------------|-----------------------|--|
| Deaths, n (% , [95% CI]) | 8 (7.0, [3.1; 13.2]) | 7 (7.9, [3.2; 15.5]) | 6 (8.2, [3.1; 17.0]) | 5 (11.9, [4.0; 25.6]) |  |
|--------------------------|----------------------|----------------------|----------------------|-----------------------|--|

Results shown are for the intention-to-treat population. FEV<sub>1</sub>, forced expiratory volume in 1 second, GOLD, Global Initiative for Chronic Obstructive Lung Disease; HADS, Hospital Anxiety and Depression Scale; N, number of patients in group; n, number of patients with characteristic; SGRQ-C, COPD-specific version of the Saint George's Respiratory Questionnaire.

<sup>a</sup>Values are means  $\pm$  standard deviation (SD), unless otherwise indicated.

<sup>b</sup>One-way (*country*) analysis of variance for continuous variables, unless otherwise indicated.

<sup>c</sup>Chi-square test.

<sup>d</sup>In patients with  $\geq 1$  concomitant disease

<sup>e</sup>Fisher's exact test

<sup>f</sup>Country effect of two-way (*study group and country*) analysis of variance

**Table E2. Primary causes for unplanned hospital admissions according to EVC**

**assessments.**

| <b>Cause of hospitalisation, n (%)</b> | <b>Disease Management<br/>(N=157 hospital<br/>admissions)</b> | <b>Usual Management<br/>(N=160 hospital<br/>admissions)</b> |
|----------------------------------------|---------------------------------------------------------------|-------------------------------------------------------------|
| COPD exacerbation                      | 116 (73.9)                                                    | 103 (64.4)                                                  |
| Pneumonia                              | 14 (8.9)                                                      | 16 (10.0)                                                   |
| Acute cardiac failure                  | 4 (2.5)                                                       | 10 (6.3)                                                    |
| Urinary tract infection                | 3 (1.9)                                                       | 0                                                           |
| Gastroenteritis                        | 2 (1.3)                                                       | 1 (0.6)                                                     |
| Traumatic pneumothorax                 | 0                                                             | 2 (1.3)                                                     |
| Epistaxis                              | 2 (1.3)                                                       | 0                                                           |
| Lobar pneumonia                        | 2 (1.3)                                                       | 0                                                           |
| Atrial fibrillation                    | 1 (0.6)                                                       | 1 (0.6)                                                     |
| Fall                                   | 1 (0.6)                                                       | 1 (0.6)                                                     |
| Lung cancer                            | 1 (0.6)                                                       | 1 (0.6)                                                     |
| Normochromic normocytic anaemia        | 0                                                             | 1 (0.6)                                                     |
| Coronary artery disease                | 0                                                             | 1 (0.6)                                                     |
| Colitis                                | 0                                                             | 1 (0.6)                                                     |
| Colitis ulcerative                     | 0                                                             | 1 (0.6)                                                     |
| Epigastric discomfort                  | 0                                                             | 1 (0.6)                                                     |
| Rectal haemorrhage                     | 0                                                             | 1 (0.6)                                                     |
| Upper gastrointestinal haemorrhage     | 0                                                             | 1 (0.6)                                                     |
| Asthenia                               | 0                                                             | 1 (0.6)                                                     |
| Condition aggravated                   | 0                                                             | 1 (0.6)                                                     |
| Jaundice                               | 0                                                             | 1 (0.6)                                                     |
| Sepsis                                 | 0                                                             | 1 (0.6)                                                     |

|                                   |         |         |
|-----------------------------------|---------|---------|
| Thermal burn                      | 0       | 1 (0.6) |
| Back pain                         | 0       | 1 (0.6) |
| Bile duct cancer                  | 0       | 1 (0.6) |
| Cerebrovascular accident          | 0       | 1 (0.6) |
| Hypoxic-ischaemic encephalopathy  | 0       | 1 (0.6) |
| Neuralgia                         | 0       | 1 (0.6) |
| VII <sup>th</sup> nerve paralysis | 0       | 1 (0.6) |
| Anxiety                           | 0       | 1 (0.6) |
| Acute renal failure               | 0       | 1 (0.6) |
| Bronchopneumonia                  | 0       | 1 (0.6) |
| Haemoptysis                       | 0       | 1 (0.6) |
| Pulmonary arterial hypertension   | 0       | 1 (0.6) |
| Femoral artery occlusion          | 0       | 1 (0.6) |
| Septic shock                      | 0       | 1 (0.6) |
| Acute coronary syndrome           | 1 (0.6) | 0       |
| Left ventricular failure          | 1 (0.6) | 0       |
| Diarrhoea                         | 1 (0.6) | 0       |
| Intestinal obstruction            | 1 (0.6) | 0       |
| Chest pain                        | 1 (0.6) | 0       |
| Appendicitis                      | 1 (0.6) | 0       |
| Toxicity to various agents        | 1 (0.6) | 0       |
| Syncope                           | 1 (0.6) | 0       |
| Delirium                          | 1 (0.6) | 0       |
| Urosepsis                         | 1 (0.6) | 0       |
| Arm amputation                    | 1 (0.6) | 0       |

COPD, chronic obstructive pulmonary disease; N, number of patients in group; n, number of causes of hospitalisation.

**Table E3. Components of educational & exercise program practices routinely available at study start to COPD patients (both groups) by country in the 33 study centres.**

|                               | <b>Spain</b><br>(N=7) | <b>France</b><br>(N=12) | <b>Germany</b><br>(N=8) | <b>Italy</b><br>(N=6) | <b>Total</b><br>(N=33) |
|-------------------------------|-----------------------|-------------------------|-------------------------|-----------------------|------------------------|
| Educational booklets/sheets   | 3 (42.9)              | 2 (16.7)                | 2 (33.3)                | 0 (0.0)               | 7 (22.6)               |
| Specific educational sessions | 1 (14.3)              | 1 (8.3)                 | 2 (28.6)                | 2 (33.3)              | 6 (18.8)               |
| Specific exercise program     | 4 (57.1)              | 5 (41.7)                | 2 (28.6)                | 2 (33.3)              | 13 (40.6)              |

%, (n row / n non-missing)\*100; COPD, chronic obstructive pulmonary disease; N, number of centers; n, number of centers with non-missing data.

**Table E4. Baseline characteristics and number of hospital days for patients who died during the study.**

| Baseline characteristic <sup>ab</sup>                | Deaths (N=26) |
|------------------------------------------------------|---------------|
| Age, y                                               | 69.2 ± 9.0    |
| Men/Women, n                                         | 17/9          |
| Current smokers, n (%)                               | 6 (23.1)      |
| Pack-years                                           | 47.3 ± 20.8   |
| Body mass index, kg/m <sup>2</sup>                   | 25.5 ± 7.8    |
| 6-min walking distance, m                            | 219 ± 121     |
| FEV <sub>1</sub> , % of predicted                    | 35.2 ± 11.7   |
| PaO <sub>2</sub> (room air), mmHg                    | 62.7 ± 11.5   |
| PaCO <sub>2</sub> (room air), mmHg                   | 44.4 ± 7.2    |
| Total exacerbations in the past 12 mo                | 1.2 ± 0.6     |
| GOLD group A-D combined severity, n (%) <sup>c</sup> |               |
| A - Low risk, less symptoms                          | 1 (3.8)       |
| B - Low risk, more symptoms                          | 0 (0.0)       |
| C - High risk, less symptoms                         | 3 (11.5)      |
| D - High risk, more symptoms                         | 22 (84.6)     |
| BODE index                                           | 6.2 ± 2.3     |
| BODE index of 7–10, n (%)                            | 12 (54.5)     |
| COPD treatments, n (%)                               |               |
| Long-term oxygen therapy                             | 22 (84.6)     |

|                                                                                   |             |
|-----------------------------------------------------------------------------------|-------------|
| Home mechanical ventilation                                                       | 12 (46.2)   |
| SGRQ-C total score (0 best - 100 poorest) <sup>d</sup>                            | 63.7 ± 20.3 |
| HADS, total score (0 best - 42 poorest) <sup>d</sup>                              | 21.2 ± 2.8  |
| Age-adjusted Charlson comorbidity index score                                     | 4.88 ± 2.05 |
| Number of concomitant diseases <sup>e</sup>                                       | 4.3 ± 2.8   |
| Living with partner, n (%)                                                        | 17 (65.4)   |
| <b>Outcomes</b>                                                                   |             |
| Unplanned hospitalisation days/year, any cause (primary endpoint), median [Q1–Q3] | 68 [21–110] |

BODE index, body mass index, airflow obstruction, dyspnea, and exercise index; COPD, chronic obstructive pulmonary disease; FEV<sub>1</sub>, forced expiratory volume in 1 second; GOLD, Global Initiative for Chronic Obstructive Lung Disease; HADS, Hospital Anxiety and Depression Scale; N, number of patients in group; n, number of patients with characteristic; PaCO<sub>2</sub>, arterial blood carbon dioxide partial pressure; PaO<sub>2</sub>, arterial blood oxygen partial pressure; Q1–Q3, interquartile range; SGRQ-C, COPD-specific version of the Saint George's Respiratory Questionnaire.

<sup>a</sup>Values are means ± standard deviation (SD), unless otherwise indicated.

<sup>b</sup>One patient who died prior to randomisation is not included.

<sup>c</sup>GOLD A-D stage was determined using modified Medical Research Council dyspnea scale.

<sup>d</sup>SGRQ-C and HADS scores were collected after the run-in period in which patients in the DM group had already received four home-coaching sessions. HADS scores of 11–21 indicate moderate-to-severe anxiety or depression.

<sup>e</sup>In patients with ≥1 concomitant disease.
